# Supplementary material for: Composition, Formation, and Regulation of the Cytosolic C-ring, a Dynamic Component of the Type III Secretion Injectisome
Source: PLoS Biol. 2015 Jan 15;13(1):e1002039. doi: 10.1371/journal.pbio.1002039 (PMC4295842; doi:10.1371/journal.pbio.1002039)
Supplement: S1 Data — Numerical values and raw data used to generate Figs. 1B, 1C, 2D, 2E, 2F, 3B, 3D, 3G, and 4. (XLSX) [file pbio.1002039.s001.xlsx]

## Sheet: Fig 1B
fluorescence intensity	0	50	100	150	200	250	300	350	400	450	500	550	600	650	700	750	800	850	900	950	1000	1050	1100	1150	1200	1250	1300	1350	1400	1450	1500	1550	1600	1650	1700	1750	1800	1850	1900	1950	2000	2050	2100	2150	2200	2250	2300	2350	2400
EGFP-YscQ_non-secreting	0	0	0.0878735	0.644405	1.87463	3.07557	7.2935	9.72466	10.8377	12.0094	11.1599	9.40246	7.38137	7.00059	5.15524	4.24722	3.16344	2.54833	1.58172	1.34739	0.702988	0.410076	0.175747	0.117165	0.0292912	0.0292912	0	0	0	0	0	0	0	0	0	0	0	0	0	0	0	0	0	0	0	0	0	0	0
EGFP-YscD_non-secreting	0	0.0236911	0	0.236911	0.852878	2.46387	4.83298	7.48638	9.64226	10.8979	10.2109	9.2869	8.71831	7.58114	6.60981	5.0462	4.21701	3.10353	2.55864	1.89529	1.51623	0.687041	0.687041	0.45013	0.331675	0.236911	0.142146	0.142146	0.0236911	0.0236911	0	0.0473821	0.0236911	0.0236911	0	0	0	0	0	0	0	0	0	0	0	0	0	0	0
[truncated: 15 more columns]

## Sheet: Fig 1C
Strain	Image number	Spot intensities
EGFP-YscQ, non-secreting	1	1126.52	1072.52	884.524	908.524	812.524	1260.52	976.524	712.524	757.524	684.524	830.524	1007.52	634.524	685.524	1016.52	592.524	1144.52	802.524	1050.52	764.524	1147.52	498.524	563.524	760.524	567.524	646.524	603.524	840.524	626.524	908.524	681.524	730.524	617.524	698.524	879.524	643.524	782.524	581.524	695.524	768.524	647.524	580.524	578.524	581.524	1017.52	704.524	765.524	474.524
	2	802.538	696.538	695.538	779.538	706.538	783.538	643.538	658.538	697.538	660.538	843.538	584.538	606.538	704.538	802.538	773.538	551.538	1040.54	547.538	659.538	898.538	670.538	509.538	520.538	996.538	641.538	750.538	613.538	738.538	483.538	588.538	675.538	523.538	591.538	704.538	745.538	597.538	602.538	981.538	571.538	789.538	986.538	496.538	817.538	711.538	516.538	592.538	438.538
	3	1014.25	1011.25	877.255	836.255	834.255	686.255	753.255	1196.25	802.255	640.255	1055.25	922.255	650.255	966.255	634.255	536.255	709.255	920.255	610.255	723.255	756.255	817.255	714.255	657.255	1138.25	693.255	1052.25	635.255	495.255	898.255	695.255	609.255	657.255	559.255	702.255	633.255	974.255	723.255	491.255	592.255	757.255	847.255	694.255	917.255	635.255	1048.25	930.255	710.255
	4	833.662	913.662	737.662	710.662	654.662	598.662	530.662	972.662	626.662	696.662	671.662	530.662	553.662	1170.66	954.662	848.662	573.662	540.662	706.662	517.662	473.662	744.662	585.662	520.662	686.662	591.662	640.662	505.662	504.662	451.662	505.662	480.662	451.662	640.662	956.662	1011.66	389.662	595.662	752.662	527.662	454.662	571.662	639.662	587.662	508.662	789.662	497.662	1012.66
	5	1010.23	820.23	755.23	771.23	993.23	799.23	774.23	630.23	618.23	604.23	661.23	688.23	924.23	766.23	665.23	654.23	419.23	540.23	638.23	710.23	776.23	534.23	882.23	622.23	290.23	464.23	507.23	585.23	726.23	419.23	715.23	762.23	1068.23	565.23	525.23	617.23	588.23	885.23	571.23	887.23	765.23	574.23	968.23	858.23	615.23	664.23	591.23	719.23
	6	758.419	750.419	885.419	820.419	667.419	684.419	700.419	930.419	783.419	706.419	1219.42	640.419	585.419	728.419	1163.42	424.419	532.419	591.419	699.419	649.419	510.419	1016.42	1161.42	553.419	774.419	722.419	733.419	675.419	486.419	531.419	835.419	747.419	537.419	488.419	397.419	509.419	965.419	575.419	399.419	554.419	556.419	571.419	498.419	566.419	513.419	597.419	979.419	483.419
	7	6018.78	881.782	726.782	921.782	916.782	833.782	718.782	878.782	914.782	884.782	829.782	710.782	748.782	607.782	867.782	751.782	642.782	716.782	715.782	676.782	655.782	684.782	646.782	773.782	610.782	655.782	770.782	747.782	729.782	723.782	619.782	637.782	747.782	648.782	681.782	556.782	764.782	673.782	566.782	575.782	546.782	567.782	696.782	643.782	633.782	555.782	607.782	551.782
	8	975.957	909.957	874.957	820.957	975.957	897.957	824.957	742.957	822.957	850.957	701.957	663.957	806.957	832.957	950.957	895.957	807.957	683.957	965.957	815.957	739.957	799.957	748.957	681.957	748.957	667.957	780.957	581.957	810.957	637.957	743.957	603.957	605.957	599.957	653.957	838.957	742.957	519.957	702.957	739.957	597.957	654.957	585.957	779.957	779.957	632.957	545.957	654.957
	9	1110.02	995.022	987.022	945.022	979.022	970.022	1009.02	884.022	868.022	855.022	763.022	825.022	985.022	699.022	843.022	837.022	841.022	730.022	823.022	840.022	851.022	697.022	600.022	765.022	767.022	783.022	601.022	789.022	782.022	688.022	746.022	634.022	756.022	579.022	609.022	744.022	703.022	736.022	642.022	738.022	660.022	784.022	697.022	689.022	672.022	783.022	635.022	605.022
	10	819.994	801.994	716.994	789.994	699.994	664.994	697.994	753.994	731.994	735.994	700.994	646.994	664.994	557.994	561.994	697.994	624.994	556.994	543.994	572.994	608.994	730.994	594.994	650.994	682.994	690.994	599.994	574.994	649.994	617.994	598.994	543.994	525.994	614.994	695.994	518.994	495.994	541.994	503.994	502.994	529.994	547.994	649.994	536.994	491.994	549.994	615.994	494.994
	11	1094.31	980.312	917.312	789.312	937.312	951.312	788.312	985.312	861.312	955.312	950.312	752.312	750.312	780.312	750.312	648.312	684.312	730.312	661.312	732.312	916.312	740.312	804.312	795.312	696.312	687.312	751.312	692.312	631.312	808.312	647.312	791.312	666.312	701.312	837.312	470.312	717.312	668.312	677.312	614.312	636.312	631.312	589.312	634.312	735.312	542.312	605.312	825.312
EGFP-YscD-non-secreting	1	900.124	978.124	-59.876	622.124	958.124	1095.12	861.124	695.124	684.124	599.124	1061.12	687.124	619.124	678.124	638.124	586.124	777.124	566.124	668.124	826.124	552.124	724.124	915.124	695.124	710.124	537.124	797.124	752.124	634.124	988.124	709.124	697.124	628.124	751.124	683.124	879.124	526.124	574.124	595.124	503.124	655.124	670.124	523.124	735.124	631.124	607.124	623.124	1014.12
	2	832.333	803.333	753.333	781.333	911.333	1135.33	976.333	1026.33	801.333	789.333	641.333	704.333	819.333	796.333	843.333	606.333	817.333	683.333	760.333	998.333	843.333	958.333	594.333	838.333	662.333	698.333	596.333	647.333	1074.33	512.333	602.333	618.333	597.333	715.333	654.333	598.333	645.333	387.333	924.333	575.333	479.333	866.333	1127.33	662.333	749.333	566.333	1126.33	923.333
	3	1089.44	988.437	999.437	963.437	1367.44	1075.44	941.437	763.437	1114.44	1028.44	933.437	699.437	1199.44	1343.44	922.437	733.437	694.437	527.437	1244.44	691.437	767.437	796.437	1119.44	765.437	932.437	1221.44	1321.44	1237.44	567.437	824.437	1245.44	649.437	877.437	667.437	793.437	909.437	1198.44	728.437	648.437	568.437	1200.44	1269.44	713.437	960.437	1402.44	671.437	690.437	665.437
	4	1201.3	987.303	727.303	790.303	1091.3	837.303	828.303	1333.3	1131.3	730.303	1397.3	902.303	749.303	495.303	722.303	989.303	605.303	822.303	836.303	801.303	605.303	614.303	669.303	824.303	1139.3	728.303	602.303	444.303	1062.3	682.303	843.303	653.303	996.303	956.303	633.303	812.303	700.303	608.303	886.303	627.303	567.303	547.303	845.303	568.303	629.303	715.303	430.303	644.303
	5	966.444	855.444	866.444	858.444	1162.44	804.444	748.444	509.444	817.444	756.444	781.444	623.444	761.444	1030.44	801.444	652.444	752.444	642.444	655.444	633.444	571.444	717.444	500.444	702.444	594.444	623.444	694.444	648.444	1018.44	530.444	480.444	783.444	933.444	647.444	679.444	645.444	915.444	617.444	652.444	609.444	545.444	433.444	622.444	652.444	576.444	699.444	529.444	818.444
	6	1053.11	889.106	944.106	723.106	776.106	971.106	566.106	1097.11	938.106	864.106	952.106	817.106	849.106	687.106	707.106	881.106	1374.11	883.106	730.106	687.106	693.106	787.106	934.106	645.106	650.106	683.106	709.106	735.106	866.106	608.106	536.106	345.106	893.106	753.106	787.106	747.106	580.106	1123.11	814.106	635.106	469.106	604.106	604.106	1171.11	880.106	1005.11	536.106	450.106
	7	1146.59	1357.59	1223.59	1009.59	1004.59	953.585	856.585	998.585	911.585	1029.59	1044.59	876.585	723.585	786.585	779.585	855.585	914.585	746.585	632.585	929.585	773.585	733.585	798.585	761.585	806.585	725.585	835.585	677.585	670.585	685.585	670.585	673.585	699.585	693.585	662.585	659.585	728.585	736.585	737.585	702.585	704.585	715.585	706.585	617.585	685.585	644.585	559.585	685.585
	8	1390.9	1282.9	1343.9	1270.9	1214.9	1267.9	1262.9	1172.9	1146.9	1117.9	1212.9	1110.9	1020.9	1144.9	1220.9	1032.9	1131.9	1083.9	1152.9	1066.9	890.899	1030.9	982.899	1064.9	847.899	924.899	987.899	913.899	908.899	811.899	1103.9	789.899	1064.9	771.899	974.899	800.899	787.899	820.899	893.899	891.899	800.899	801.899	835.899	896.899	816.899	796.899	869.899	923.899
	9	1674.23	1557.23	1255.23	1292.23	1170.23	1201.23	1059.23	1074.23	1270.23	749.232	1009.23	949.232	1034.23	911.232	1058.23	889.232	963.232	985.232	1005.23	1021.23	1071.23	959.232	885.232	831.232	934.232	829.232	740.232	1012.23	980.232	1071.23	570.232	996.232	1148.23	944.232	767.232	925.232	844.232	822.232	884.232	763.232	848.232	973.232	737.232	907.232	810.232	671.232	864.232	814.232
	10	1567.02	1641.02	1259.02	1472.02	1137.02	1176.02	962.023	986.023	1116.02	982.023	1015.02	1102.02	959.023	1155.02	965.023	987.023	909.023	1013.02	799.023	689.023	900.023	1001.02	1011.02	1067.02	887.023	852.023	849.023	776.023	903.023	812.023	720.023	855.023	927.023	744.023	799.023	944.023	768.023	848.023	697.023	823.023	822.023	705.023	747.023	810.023	717.023	711.023	627.023	754.023
	11	1286.72	1385.72	1210.72	1007.72	1219.72	926.724	1144.72	972.724	804.724	1037.72	948.724	794.724	886.724	925.724	950.724	816.724	924.724	906.724	857.724	831.724	861.724	839.724	794.724	941.724	731.724	764.724	928.724	646.724	780.724	804.724	758.724	893.724	727.724	917.724	962.724	780.724	853.724	752.724	742.724	675.724	728.724	638.724	944.724	635.724	707.724	833.724	737.724	755.724
bin size	50	0	50	100	150	200	250	300	350	400	450	500	550	600	650	700	750	800	850	900	950	1000	1050	1100	1150	1200	1250	1300	1350	1400	1450	1500	1550	1600	1650	1700	1750	1800	1850	1900	1950	2000	2050	2100	2150	2200	2250	2300	2350
EGFP-YscQ, non-secreting		0	0	3	22	64	105	249	332	370	410	381	321	252	239	176	145	108	87	54	46	24	14	6	4	1	1	0	0	0	0	0	0	0	0	0	0	0	0	0	0	0	0	0	0	0	0	0	0
EGFP-YscD-non-secreting		0	1	0	10	36	104	204	316	407	460	431	392	368	320	279	213	178	131	108	80	64	29	29	19	14	10	6	6	1	1	0	2	1	1	0	0	0	0	0	0	0	0	0	0	0	0	0	0
percentage		0	50	100	150	200	250	300	350	400	450	500	550	600	650	700	750	800	850	900	950	1000	1050	1100	1150	1200	1250	1300	1350	1400	1450	1500	1550	1600	1650	1700	1750	1800	1850	1900	1950	2000	2050	2100	2150	2200	2250	2300	2350
EGFP-YscQ, non-secreting		0	0	0.0878735	0.644405	1.87463	3.07557	7.2935	9.72466	10.8377	12.0094	11.1599	9.40246	7.38137	7.00059	5.15524	4.24722	3.16344	2.54833	1.58172	1.34739	0.702988	0.410076	0.175747	0.117165	0.0292912	0.0292912	0	0	0	0	0	0	0	0	0	0	0	0	0	0	0	0	0	0	0	0	0	0
EGFP-YscD-non-secreting		0	0.0236911	0	0.236911	0.852878	2.46387	4.83298	7.48638	9.64226	10.8979	10.2109	9.2869	8.71831	7.58114	6.60981	5.0462	4.21701	3.10353	2.55864	1.89529	1.51623	0.687041	0.687041	0.45013	0.331675	0.236911	0.142146	0.142146	0.0236911	0.0236911	0	0.0473821	0.0236911	0.0236911	0	0	0	0	0	0	0	0	0	0	0	0	0	0
stoichiometries, normalized to YscD = 24			YscQ	st.dev.	YscD	st.dev.
non-secreting			21.966	8.25678	24	8.33553
secreting			22.2145	6.82642	24	8.61437
[truncated: 428 more columns]

## Sheet: Fig 2D
conditions	image	number of cells with n spots
		0	1	2	3	4	5	6	7	8	number of cells	number of spots	average number of spots per cell
no arabinose	1	48	4								52	4
	2	46	9								55	9
	3	26	1								27	1
	4	35	4		1						40	7
	SUM	155	18	0	1						174	21	0.12069
0.001%	1	33	19	1							53	21
	2	32	10	1	1						44	15
	3	37	14	3							54	20
	4	36	11	3							50	17
	SUM	138	54	8	1						201	73	0.363184
0.002%	1	31	70								101	70
	2	16	26								42	26
	3	15	28								43	28
	4	20	19								39	19
	SUM	114	85	21	4	1					225	143	0.635556
0.004%	1	10	25								35	25
	2	15	58								73	58
	3	13	37								50	37
	4	27	45								72	45
	SUM	114	78	27	11						230	165	0.717391
0.01%	1	45	58	25	11	2					141	149
	2	27	22	13	10	1					73	82
	3	22	12	10	5	2	1				52	60
	4	8	21	23	4	3					59	91
	SUM	102	113	71	30	8	1				325	382	1.17538
0.02%	1	5	9	11	12	6	1	1			45	102
	2	12	13	11	12	7	5	1			61	130
	3	11	15	23	24	6	1				80	162
	4	13	11	10	14	12					60	121
	SUM	41	48	55	62	31	7	2			246	515	2.0935

## Sheet: Fig 2E
conditions	band intensity YscQC	number of YscQM218A foci
no YscQC	0	0.056
no arabinose	1.59319	0.12069
0.001%	2.93832	0.363184
0.002%	4.4134	0.635556
0.004%	5.11505	0.717391
0.01%	9.9259	1.17538
0.02%	20.728	2.0935

## Sheet: Fig 2F
conditions	image	average intensity	standard deviation	single values
no arabinose	1	20.9651	8.4444	34.8747	17.7386	4.5946	18.1303
	2			39.6701	20.9902	27.3009	26.8785	24.3786	23.1675	16.8919	23.5513	20.6363
	3			3.1925
	4			16.194	15.9756	19.0449	15.0393	18.1584	26.9955	26.8637
0.001%	1	19.5105	11.3214	23.4008	17.2825	22.6995	31.1805	32.175	18.12	17.3314	15.3836	16.9654	7.61523	20.0042	23.9808	6.92667	14.4232	20.3915	11.3409	19.7536	23.1719	29.5729	13.7971	19.4099
	2			21.0162	28.3612	16.5902	4.6801	12.6375	36.1116	30.1782	28.8513	20.6175	0.607259	18.6354	34.528	23.9111	30.0623	10.59
	3			25.4524	33.5571	15.0032	25.2471	20.9351	1.81453	46.4117	2.57412	26.5051	-26.6148	23.2213	25.3029	22.6784	9.89804	11.2591	2.92016	20.0346	27.0313	13.7897	1.66533
	4			23.4334	3.18279	21.295	27.1331	8.01315	43.3229	23.7774	26.1275	23.6675	18.308	40.5596	15.549	30.2379	24.4812	25.951	11.7883	6.45098
0.002%	1	19.0481	10.0666	24.5461	28.7647	24.031	16.5831	0.186275	1.04822	31.6328	9.25503	36.3264	14.5771	24.0307	14.9534	28.7838	26.7611	21.7868	23.1899	24.6562	0.804242	16.2419	13.1465	12.0833	23.355	30.496	27.8045	19.0465	22.7913	15.4398	16.9178	6.78169	0.815273	14.544	14.8114	21.6587	21.8251	17.6334	13.5858	8.92704	19.3169	19.5357	29.2428	17.1526	29.4865	15.8869	5.16178	22.9604	11.4895
	2			4.91563	19.6204	24.343	30.8805	30.5931	21.0148	32.8878	11.8214	26.9868	21.6238	2.05674	19.4927	14.6306	21.6142	22.5112	0.641713	24.5735	16.4465	39.7514	19.8853	39.4163	31.952	28.5288	3.36221	26.5486	35.8675
	3			54.0025	22.7266	10.7005	29.4774	11.3715	30.9992	28.7496	26.4596	22.5306	14.5989	21.0423	8.57439	12.7906	10.3802	1.78454	19.6994	21.8671	7.05239	15.6983	24.503	11.856	20.0457	21.9229	10.3427	28.1447	28.0381	0.28491	18.6038
	4			29.2837	20.9102	20.3838	8.13514	34.8633	5.65959	23.1845	18.5596	16.8223	2.58633	18.1329	4.60284	16.9096	6.7179	7.56572	14.4959	32.2646	20.4515	4.46194
0.004%	1	20.7298	11.3738	21.9392	38.2522	25.0642	31.5704	14.1057	28.6542	26.569	6.56365	3.37236e-08	28.3445	32.9735	34.163	8.42391	11.2354	54.5946	30.0035	40.3756	1.47977	28.3425	11.4908	8.7132	34.6397	2.52234	24.5484	30.3775
	2			8.50669	21.0789	36.9433	20.7202	15.7697	13.6439	2.25378	18.334	20.7485	16.3836	12.5808	17.6498	14.2999	20.3266	8.19098	6.82756	40.2286	21.3277	3.42024	20.2007	18.496	23.8451	31.8176	2.2029	15.3869	6.639	29.9506	0.854474	24.8926	19.7942	34.3669	19.3909	25.0681	46.9493	25.2381	23.3415	21.8775	39.3074	13.9984	39.5973	2.18066	39.9166	31.1774	4.59582	23.3883	19.4172
	3			31.2221	11.6069	35.6148	15.7628	10.071	53.596	22.1015	20.7646	11.5591	34.4566	11.5041	17.7475	20.2241	32.2764	35.8637	12.5228	29.4236	33.2166	23.2195	6.83235	26.9232	2.60392	29.2848	35.2009	9.58835	20.0443	26.4792	15.4091	12.0541	26.5939	48.3437	24.8938	24.1363	6.94561	16.8755	23.1537	29.0821
	4			29.8144	13.442	20.5277	25.8245	17.9486	12.6675	22.9611	24.8963	14.6809	21.2279	33.6206	15.1013	34.3595	30.2997	7.24584	27.5048	25.42	28.5048	22.0771	19.2988	16.1488	0.325862	21.3057	32.0121	25.3521	14.9739	40.3684	17.6683	1.6095	20.118	21.5865	28.2465	13.6638	27.7141	5.10214	0.730225	27.3985	11.6428	30.7423	20.5941	20.2433	8.52877	21.4423	20.7985	35.4376
0.01%	1	23.3397	13.6239	5.03576	10.612	64.4094	5.68148	8.15478	28.0848	18.7524	19.1942	6.68662	21.0749	31.7784	0.628551	20.7351	28.2144	0.632126	17.1515	50.0162	38.0606	4.59215	21.3946	31.1572	16.5227	6.30259	23.9413	25.8767	1.99811	30.2556	25.3165	33.6418	18.2088	21.1641	27.2912	19.4071	24.9308	8.02532	34.2551	43.0783	3.45102	19.3053	6.11379	3.5654	44.0112	32.6141	31.5392	24.5499	39.1831
	2			26.7371	27.497	35.2024	25.601	30.4914	19.1143	32.9282	15.2601	27.3816	0.759333	55.8487	14.9569	37.648	5.60078	1.44944	31.9362	30.3762	0.802306	43.7293	15.3695	24.5564	19.247	3.46771	5.99919	10.7569	26.4758	24.925	21.0754	24.8364	17.3545	34.6602	27.4024	52.1232	7.45637	12.7281	5.12526	25.6596	28.9616	37.5999	19.6425	41.651	-16.6221	25.4951	19.877	27.2912	34.3705
	3			10.0559	8.32812	22.6373	5.00234	7.44157	9.40363	18.1187	49.7081	9.47423	21.2064	20.564	37.4562	1.56228	21.4207	49.4219	-0.117356	31.7671	30.246	0.00406893	25.467	35.8411	26.9541	38.842	17.76	4.77207	30.3061	41.0961	39.1352	24.0052	16.9028	5.46986	3.79465	8.74048	7.83557	19.2197	31.4724	29.2131	40.0989	4.76323	20.9751	18.624	20.5523	22.5491	27.108	5.1998	41.9827
	4			19.8382	43.2697	17.4851	39.7101	48.6783	2.46409	10.3803	35.0939	17.8347	3.63688	6.3133	37.4595	31.7682	38.7498	41.4887	37.9696	17.3361	39.7691	46.8918	28.8582	50.6346	27.2004	1.59117	19.718	21.7905	45.3601	47.0565	2.58614	9.65274	22.6733	41.1854	23.0311	37.0198	25.2084	37.3428	38.1153	7.74151	45.4204	30.1517	32.0181	34.0145	41.539	38.0545	26.1456	10.1329	27.7178
0.02%	1	22.7029	14.0645	11.9084	44.5508	19.5919	19.3781	25.035	20.7061	13.8636	36.7679	28.3221	1.97973	29.0728	49.9011	16.4951	23.5462	10.3865	28.2019	7.95897	4.04231	45.4362	16.4353	6.26985	60.9557	4.56001	22.4573	36.1634	34.3367	25.2988	36.2125	12.0464	39.4612	4.04222	19.7119	8.91258	2.98141	18.5241	33.295	3.90457	9.35676	25.5656	0.761332	16.6438	32.2526	27.8886	20.2611	32.9003	31.1582
	2			11.2859	41.8064	8.31912	18.1762	23.5445	3.76607	20.0086	2.05952	32.9432	30.96	18.3583	56.4579	17.2156	29.1281	3.25188	7.14968	11.0036	32.1072	25.7839	15.5263	23.5914	4.34035	34.4545	15.058	41.0715	23.9165	10.5082	3.48166	29.1623	11.9825	18.3499	14.3672	3.38523	29.7884	21.3763	34.2006	4.07682	37.9202	16.3862	41.4002	2.87299	39.5399	30.7334	2.76017	8.80071	0.845836
	3			36.451	23.8256	13.9775	2.53759	39.5832	22.4638	5.58298	1.89497	21.045	32.2585	38.83	25.0713	1.9486	15.074	1.0474	35.712	9.04413	17.3921	27.8465	3.31497	26.7228	2.42344	24.0149	23.1893	27.9417	33.9519	1.38097	16.7412	9.16468	23.1883	25.2186	5.43693	10.1477	17.7093	13.0844	29.2466	20.4513	13.1169	40.8193	29.0454	9.54581	33.0034	48.4396	26.2805	2.58188	20.2977
	4			14.6271	39.3907	27.9697	66.0792	29.8874	2.86038e-05	45.1984	10.3768	15.1775	22.6246	33.5675	15.9594	24.41	18.8511	10.0104	27.5394	17.667	50.1419	34.5154	39.2752	43.2611	7.07328	37.1827	27.921	15.4981	22.6493	8.85245	25.5036	29.5437	41.2847	40.8681	43.2328	5.54165	24.93	23.0995	1.37864	6.35977	8.77039	34.7796	4.24564	15.8298	14.3804	3.41688	32.2114	34.3939	19.2128
[truncated: 116 more columns]

## Sheet: Fig 3B
strain	relative bla activity (normalized)	standard error of the mean
WT	1	0.00925033
GST-bla	0.251698	0.0200668
dYscN	0.205378	0.0141924
YscC-mCh	0.818385	0.0269767
YscV-mCh	0.812178	0.0237025
EGFP-YscQ	0.848486	0.0441701

## Sheet: Fig 3D
YscC-mCh		YscV-mCherry		EGFP-YscQ
time	relative spot intensity	time	relative spot intensity	time	relative spot intensity
0	1	0	1	0	1
2	-0.0357978	2	-0.0397493	2	-0.0410844
4	0	4	-0.000975518	3	0.105164
6	0.0551121	6	0.0051106	4	0.182802
8	0.0375762	8	0.00199455	5	-0.0350798
10	-0.0109887	10	0.0691302	6	0.0433896
12	0.0439103	12	-0.00988239	7	0.0892043
14	0.0399051	14	0.0343659	8	0.203143
16	0.00742834	16	0.0837825	9	0.148734
18	-0.0242556	18	0.0743689	10	0.281995
20	-0.0295777	20	0.111733	11	0.22318
24	-0.0506098	22	0.15898	12	0.0856816
28	-0.0170075	24	0.166301	13	0.172775
32	-0.00465366	26	0.0857258	14	0.156257
36	0.0346365	28	0.0427518	15	0.206572
40	-0.050814	30	-0.025844	16	0.241038
44	0.0544435	32	0.0801915	17	0.204856
48	0.0594258	34	-0.0412285	18	0.267077
52	0.0392259	36	0.0898294	19	0.256941
56	0.0885223	38	0.0846616	20	0.34022
60	0.0235225	40	0.0506504	21	0.261735
66	0.0197726	42	0.0372245	22	0.276147
72	0.0402019	44	0.121597	23	0.286224
78	0.0835796	46	0.140143	24	0.323565
84	0.0657065	48	0.0652954	25	0.377887
90	0.122876	50	0.0866403	27	0.462252
96	0.0316221	54	0.127553	29	0.454632
102	0.0525867	58	0.0987394	31	0.220519
108	0.0694986	62	-0.0503468	33	0.45467
114	0.0843746	66	0.0698544	35	0.402654
120	0.0377281	70	0.0437587	37	0.504936
130	0.136223	74	0.0188828	39	0.559731
140	0.0476107	78	0.135282	41	0.479155
150	-0.0793705	82	0.0922204	43	0.500803
160	0.0078569	86	0.181514	45	0.45309
170	0.00706871	90	0.0498558	47	0.494387
180	0.0627766	94	0.110799	49	0.545499
190	0.0150149	98	0.142239	51	0.456133
200	0.0591235	102	-0.0433032	53	0.534301
210	-0.0401132	106	0.07103	55	0.376699
220	0.00928438	110	0.0602852	57	0.674319
235	-0.0637908	114	-0.0246971	59	0.686495
250	-0.0203793	118	0.0383568	61	0.563405
265	-0.122693	122	-0.0281083	63	0.741044
295	0.0777725	126	0.0351529	65	0.547813
325	0.0153062	130	0.0358329	67	0.701193
340	0.0186645	134	0.126803	69	0.712061
370	0.057839	138	0.0682529	71	0.838823
390	0.0446204	142	0.0470496	73	0.734764
410	0.103508	146	0.00796629	75	0.615125
430	0.267516	150	0.139009	79	0.768644
450	0.189362	156	0.139783	83	0.717079
470	0.114996	162	0.131382	87	0.626278
490	0.218594	168	0.0573003	91	0.647436
510	0.193223	174	0.288099	95	0.605631
530	0.123182	180	0.221384	99	0.734258
550	0.224101	186	0.186297	103	0.65872
570	0.0705411	192	0.312198	107	0.699661
		198	0.186405	111	0.63405
		204	0.176336	115	0.685418
		210	0.157047	119	0.596316
		216	0.195754	123	0.507085
		222	0.212577	127	0.631719
		228	0.189309	131	0.816297
		234	0.230383	135	1.11086
		240	0.166779	139	0.719728
		246	0.0969251	143	0.785982
		252	0.118659	147	0.66485
		258	0.108649	151	0.811121
		264	0.106642	155	0.683461
		270	0.121372	159	0.629695
		276	0.311594	163	0.597997
		282	0.158528	167	0.831504
		288	0.0920872	171	0.707053
		294	0.106364	175	0.679231
		300	0.121245	181	0.718056
		310	0.111367	187	0.863797
		320	0.136206	193	0.707387
		330	0.131905	199	0.773782
		340	0.0371302	205	0.770556
		350	0.261728	211	0.869196
		360	0.114575	217	1.03704
		370	0.186346	223	0.903219
		380	0.167178	229	0.924461
		390	0.195456	235	0.971954
		400	0.0870256	241	0.938977
		410	0.125104	247	0.913922
		420	0.0533054	265	0.508038
		430	0.139024	283	0.670677
		440	0.115956	301	0.812253
		450	0.0587323	313	0.7667
		460	0.0741446	335	0.910778
		470	0.229431
		480	0.141762
		490	0.178012
		500	0.185557
		510	0.276623
		520	0.182827
		530	0.213979
		540	0.256157
		550	0.104391

## Sheet: Fig 3G
individual single step diffusion coefficients
PAmCherry-YscQ	YscV-PAmCherry
0.0421104	0.364458
0.186613	0.241517
0.776097	0.0201142
0.111741	1.13259
0.129765	0.441917
0.0857231	1.19032
0.236567	0.232059
0.179063	0.478409
0.0274399	0.121679
0.172725	0.140776
0.488319	0.239736
0.0530453	0.117224
0.0771982	0.155275
0.176538	0.362951
0.180942	0.338832
0.0712891	0.696272
1.00534	0.305181
0.220486	0.786759
0.100542	0.0592903
0.0128417	0.0799309
0.102892	0.017358
1.05317	0.546611
0.0706484	0.0497133
0.181002	0.0593489
0.125308	0.054827
1.2569	0.013145
0.298111	0.0161036
0.59628	0.0410358
0.208167	0.111427
1.09542	0.155958
1.0285	0.0659529
0.0499727	0.297812
1.83781	0.309946
0.0548147	0.147846
0.231347	0.0796694
0.115649	0.0599159
0.283233	0.0719298
0.208426	0.203436
0.224017	0.0660804
0.118644	0.142357
0.195742	0.043563
0.168494	0.118219
0.0293984	0.141494
0.0163	0.0604809
0.271916	0.0570874
0.0355445	0.0685267
0.0699499	0.246289
0.0551373	0.00488385
0.0454651	0.723767
0.163816	0.0188198
0.146423	0.125086
0.145965	0.00497707
0.872784	0.055558
0.0969507	0.0107263
0.191639	0.0303854
0.853215	0.0647603
0.0411114	0.0575504
0.468788	0.239987
0.15494	0.00535376
0.304266	0.0922027
1.68932	0.140153
0.0231995	0.184186
0.00440642	0.0264564
0.137675	0.142473
0.882836	0.00355503
1.37174	0.352043
1.13112	0.0609822
0.0702084	0.215756
0.96221	0.499134
0.484801	0.0246323
1.38312	0.0121906
0.058057	0.331655
0.0341898	0.381792
0.15669	0.05031
1.68178	0.0813461
0.712766	0.0168828
0.15042	0.00543626
0.124808	1.7144
1.92002	0.0237325
0.887734	0.0697523
1.95139	0.268774
1.78476	0.0114979
0.64208	0.141026
0.379348	0.21392
2.21419	0.662797
1.51589	0.080252
0.0603332	0.112797
0.468973	0.622482
0.0141204	0.157818
0.0943196	0.0482085
0.154231	0.0873196
0.0138489	0.0941658
0.107357	0.139907
0.0949423	0.0684401
0.0252342	0.0610647
0.150216	0.295118
1.02024	0.520938
0.88337	0.736553
1.57601	0.223068
1.18311	0.00242403
0.151255	0.0634989
0.0938484	0.152018
0.127502	0.0133558
0.0481649	0.0253945
0.970254	0.251079
0.205466	0.10255
0.295983	0.14432
0.0237105	0.196031
0.080444	0.136633
1.2712	0.0851741
1.05932	0.156443
0.0824993	0.145704
0.0296695	0.00336098
0.0963341	0.00366341
0.0466188	0.101299
0.0438356	0.135262
0.519475	0.0787992
0.0136998	0.0886148
0.298694	0.137839
0.0215558	0.100104
0.404035	0.168166
0.105707	0.0979471
1.29632	0.011545
0.139773	0.161848
1.69514	0.0096484
0.495855	0.00599957
2.002	0.0721842
0.115909	0.139089
0.145245	0.0294897
0.0118348	0.0584896
0.195054	0.0318668
0.0790404	0.567918
0.398248	0.0502218
0.0836835	0.00340043
0.267459	0.135855
1.50783	0.140031
0.582244	0.130866
0.78399	0.19737
1.27838	0.127731
0.366098	0.101402
0.0202694	0.0339291
0.102434	0.0603256
0.833518	0.162213
0.298281	0.00592823
1.22137	0.131069
0.953865	0.00863191
1.81824	0.069827
0.0881191	0.0408975
1.4053	0.0959071
0.930029	0.0163735
0.867204	0.0963844
2.09823	0.179376
1.6163	0.0797694
1.92348	0.173652
1.02778	0.0629676
1.41201	0.0105366
0.896979	0.242271
0.0280411	0.0790545
2.38664	0.247103
1.14273	0.216168
0.673574	0.0911603
0.0198552	0.159201
0.721158	0.049166
0.276085	0.0506231
0.0357479	0.0842735
0.0890926	0.0508685
0.0944789	0.00268006
0.56787	0.134199
0.92375	0.149947
1.60384	0.420141
1.38657	0.307259
0.713246	0.217293
0.920539	0.377602
1.04154	0.630794
1.49044	0.0662499
1.27643	0.261631
1.0652	0.446216
0.842492	0.587716
0.889481	0.0412629
0.0820395	0.222679
1.04074	0.523633
0.786916	0.332794
0.0799283	0.470299
0.312601	0.49821
0.714944	0.00903626
0.112761	0.0604016
0.443255	0.0255567
0.479277	0.0892081
1.28963	0.0708172
1.16166	0.0886289
1.03797	0.176427
0.104912	0.217602
0.249997	0.130262
0.142271	0.134135
1.26595	0.738035
0.0696302	0.121814
0.0779858	0.388213
0.095076	0.0407298
0.0293438	0.0129438
0.0108551	0.108906
0.69533	0.00357025
1.22064	0.830674
1.25011	0.17975
0.120006	0.101375
1.02081	0.0798801
0.152782	0.107864
0.111493	0.221499
0.264658	0.0164376
0.0111206	0.0544862
0.0577357	0.0100769
1.77337	0.196741
2.0108	0.935012
0.859874	0.00510401
0.0817602	0.0641601
1.1379	0.121984
0.580217	0.146243
0.0366079	0.190293
1.76703	0.108189
0.444796	0.123105
0.162666	0.135704
0.033985	0.0296893
0.118298	0.239273
0.0776223	0.132203
1.64634	0.00321371
0.878848	0.140141
1.3487	0.151191
1.50017	0.104487
0.552304	0.0737685
1.55723	0.0941548
0.651288	0.140374
0.0967077	0.169445
0.112867	0.0377624
0.185292	0.0879259
0.0110429	0.112138
0.126664	0.123207
0.0941981	0.160937
0.137859	0.0652186
0.939972
1.64758
0.29453
1.48471
0.660325
1.05203
1.53338
0.0331526
0.833116
1.32287
1.91534
1.1924
0.224597
0.192557
0.992382
0.0368713
0.218017
0.223907
0.0645163
0.92058
0.993321
0.339733
0.907948
0.112385
0.10073
0.0251154
0.0179005
0.0388835
0.0324433
1.66868
0.0244612
0.424742
0.15358
1.40221
1.20989
0.605246
0.164936
1.88151
1.01657
0.0746206
1.62008
1.17512
0.14375
0.93113
0.855513
1.62113
0.202772
1.45218
0.0973131
0.350397
0.844067
1.45729
1.47697
2.34083
1.09318
0.565926
1.07882
2.0356
0.146753
0.0694314
1.12479
0.0295949
1.33831
0.120239
2.03739
1.71846
0.849882
0.891544
0.35711
0.203454
0.0786956
0.760274
1.0511
0.919679
0.0168962
0.921259
1.70478
1.34402
0.099087
2.02222
0.0499706
0.161148
1.37917
0.38402
0.339506
1.16756
0.281499
0.0457215
1.33888
0.71231
0.571701
1.83535
0.0841136
1.0738
0.295389
0.00996542
0.0419727
0.410903
0.0331579
0.778357
3.07638
1.93328
0.0282292
0.0180948
0.750557
0.169337
0.0167482
0.0193802
0.0463071
1.55121
0.139836
1.34292
1.48398
0.51117
0.115564
0.0932649
0.0499358
0.150495
0.631995
1.42236
1.18238
0.841507
2.18816
0.149088
0.015149
0.0160487
0.0598439
0.0342453
0.0337676
0.0227727
0.0457979
0.0172864
0.451898
0.118826
0.265055
0.0293065
0.175196
0.14109
0.0887802
0.0619095
0.211205
0.11125
0.189385
0.258294
0.189566
0.187791
0.018791
0.0477432
0.024093
0.0603636
0.506512
0.774143
0.771773
0.143928
0.055071
0.261156
0.1373
0.242384
0.035381
1.02486
0.317971
0.578101
0.811291
1.51826
0.627839
0.0361762
0.379476
0.0216556
2.03988
0.500411
0.144769
0.94096
0.0555666
0.370653
0.0514215
1.15979
0.0311107
0.100166
0.983989
0.31234
0.0277988
0.102439
0.443279
0.0672578
1.80951
1.04656
0.358925
1.23206
0.523814
0.05848
0.84177
0.0430346
1.07715
0.452028
0.675916
0.0785384
0.0357243
1.05736
0.343135
0.781178
0.0921982
0.149728
0.898498
0.0698506
0.0635224
0.182093
0.497891
1.50713
0.0131952
0.12543
0.02144
1.35461
0.0987111
0.0153762
0.0330412
0.631502
0.816478
0.895019
0.872406
0.465842
0.0143488
0.914469
0.0617215
0.465992
0.619986
1.01535
1.50628
1.57625
1.85886
0.0354742
1.23448
0.881757
1.15447
0.227064
0.714023
0.322319
0.143713
0.17636
0.0311674
1.45641
0.138203
0.0192152
0.105824
1.25466
0.736251
0.0710085
0.163441
0.127836
1.29118
0.974472
0.316425
1.83987
1.32157
0.102988
1.68577
1.03565
0.897864
0.0291194
0.196916
0.689317
0.0304032
0.116345
2.15346
1.75205
1.35917
0.179481
0.05818
2.06492
0.0911376
0.465333
0.643908
1.76061
0.74193
0.797936
1.48559
0.0282599
1.18973
1.39348
1.16706
2.96271
0.354853
0.922064
0.774169
0.392872
0.0259211
0.666565
0.014473
2.31838
1.47444
0.795698
0.0351952
0.026795
1.00497
0.0458993
0.751638
0.132617
0.412539
0.862235
1.48895
0.253351
1.37095
0.153924
0.750896
0.0933468
0.0640721
0.154931
0.448926
1.18987
0.09245
0.0398243
0.0914818
0.0500254
0.065862
1.50582
0.0581548
0.0717286
0.0808125
0.182153
0.0766147
1.16004
0.119829
1.44312
0.130346
0.0431108
1.1921
0.842333
0.176008
0.0321427
0.043165
1.31753
0.127844
0.61897
1.32409
0.964772
1.50679
1.01568
1.05727
1.22151
1.26932
0.342705
2.00846
0.986018
0.346973
0.369484
0.25881
0.110107
0.16359
0.165038
0.160605
1.16825
0.303456

## Sheet: Fig 4_recovery_curves
EGFP-YscQ non-secreting		EGFP-YscQ secreting		EGFP-YscQ YscNK175E non-secreting		EGFP-YscQ YscNK175E secreting
time	relative spot intensity	time	relative spot intensity	time	relative spot intensity	time	relative spot intensity
2	-0.0934997	2	0.0595576	2	-0.177419	2	0.0051061
3	-0.00768793	3	0.043577	3	0.217949	3	0.148838
4	0.0242734	4	0.00974976	4	0.101992	4	-0.0121272
5	-0.0383267	5	0.0753132	5	0.101859	5	0.0164928
6	0.00159009	6	0.072497	6	-0.0618869	6	0.125572
7	0.0570528	7	0.395202	7	0.338422	7	0.0694341
8	-0.0662745	8	0.300582	8	0.147017	8	0.143143
9	0.102119	9	0.190903	9	0.540135	9	0.305751
10	-0.0855092	10	0.161588	10	0.404278	10	0.289552
11	0.0315103	11	0.199649	11	0.0232675	11	0.16318
12	-0.0599135	12	0.191862	12	-0.00986404	12	0.108544
13	0.0613633	13	-0.0127585	13	0.167115	13	0.153683
14	0.120128	14	0.1447	14	0.23405	14	0.176386
15	0.125136	15	0.154872	15	0.0869623	15	-0.0254372
16	0.14311	16	0.124727	16	0.27328	16	0.100438
17	0.0352474	17	0.224503	17	0.370474	17	0.0952742
18	0.00401929	18	0.13562	18	0.175541	18	0.0843444
19	0.122672	19	0.21247	19	0.207519	19	0.231144
20	0.0307644	20	0.163972	20	0.11615	20	0.263687
21	0.109493	21	0.195102	21	0.245072	21	0.0756792
22	0.243586	22	0.1842	22	-0.100573	22	0.134721
23	0.122501	23	0.239009	23	0.426717	23	0.0702941
24	0.0822648	24	0.191744	24	0.251057	24	0.31963
25	-0.0707706	25	0.208447	25	0.412411	25	0.386333
27	0.0221285	27	0.140955	27	0.509551	27	0.39223
29	0.0741002	29	0.320402	29	0.324936	29	0.462179
31	0.0574557	31	0.244895	31	0.28586	31	0.272098
33	0.229547	33	0.295795	33	0.0491223	33	0.267977
35	0.0971982	35	0.320618	35	0.442857	35	0.534778
37	0.113246	37	0.47959	37	0.3986	37	0.562963
39	0.28505	39	0.509659	39	0.556841	39	0.581928
41	0.152266	41	0.539587	41	0.352228	41	0.592371
43	0.22926	43	0.546673	43	0.618605	43	0.514667
45	0.145234	45	0.469788	45	0.455965	45	0.39731
47	0.153948	47	0.409646	47	0.401762	47	0.423558
49	0.215251	49	0.470911	49	0.520462	49	0.345458
51	0.0744456	51	0.770923	51	0.342332	51	0.355448
53	0.209844	53	0.592297	53	0.616158	53	0.306764
55	0.14094	55	0.546409	55	0.53696	55	0.296799
57	0.0626731	57	0.57536	57	0.766097	57	0.136297
59	0.143735	59	0.696071	59	0.512024	59	0.395967
61	-0.0191459	61	0.695006	61	0.479134	61	0.605942
63	0.196904	63	0.541999	63	0.504037	63	0.335486
65	0.157123	65	0.477	65	0.730441	65	0.486278
67	0.253934	67	0.447106	67	0.488957	67	0.521906
69	0.0639274	69	0.600041	69	0.513409	69	0.310515
71	0.0560256	71	0.489047	71	0.270033	71	0.496191
73	0.11768	73	0.652186	73	0.781791	73	0.482621
75	0.122032	75	0.492626	75	0.427061	75	0.58929
79	0.143657	79	0.381766	79	0.397678	79	0.751542
83	0.179754	83	0.667818	83	0.266207	83	0.617993
87	0.263162	87	0.793613	87	0.451055	87	0.654854
91	0.270698	91	0.657405	91	0.325434	91	0.500996
95	0.280613	95	0.639787	99	0.543295	95	0.813001
99	0.310868	99	0.610784	103	0.586486	99	0.869
103	0.369226	103	0.571161	107	0.570248	103	0.89546
107	0.311903	107	0.636595	111	0.45921	107	0.885311
111	0.393589	111	0.534859	115	0.409144	111	1.05245
115	0.462808	115	0.545681	123	0.57402	115	0.679679
119	0.389695	119	0.632981	127	0.696736	119	1.38267
123	0.292279	123	0.540912	131	0.707134	123	0.713671
127	0.288877	127	0.688294	135	1.19403	127	0.639357
131	0.328162	131	0.730504	139	0.596704	131	0.692098
135	0.250476	135	0.958994	143	0.817245	135	0.780545
139	0.385552	139	0.770217	147	0.508715	139	1.06696
143	0.432843	143	0.733657	151	0.839506	143	1.16152
147	0.445693	147	0.907369	155	0.339735	147	0.616272
151	0.390087	151	0.832138	159	0.897175	151	0.628734
155	0.40872	155	0.809343	163	0.577532	155	0.676455
159	0.397807	159	0.712138	167	0.716238	159	0.533768
163	0.271468	163	0.791386	171	0.908017	163	0.870568
167	0.250449	167	0.565393	175	0.657083	167	0.740712
171	0.271219	171	0.637742	181	0.825095	171	0.898761
175	0.389496	175	0.88029	193	0.838223	175	0.965156
181	0.367276	181	0.677852	199	0.760762	181	1.28248
187	0.292432	187	0.910794	205	1.08438	187	0.952886
193	0.270254	193	0.548564	211	0.921647	193	1.0679
199	0.3787	199	0.731355	217	0.846327	199	0.877242
205	0.308049	205	0.705195	223	1.05341	205	0.654622
211	0.580356	211	0.616395	229	1.21656	211	0.821188
217	0.393845	217	0.724559	235	0.653578	217	0.638254
223	0.381468	223	0.713837	241	0.887091	223	1.02752
229	0.548346	229	0.87765	247	1.1566	229	0.824089
235	0.370063	235	1.00964	253	1.3066	235	1.01227
241	0.415257	241	1.00474	259	1.30953	241	1.07441
247	0.672997	247	0.820993	265	1.1873	247	1.03953
253	0.596771	253	1.07092	271	0.993467	253	0.851315
259	0.534882	259	1.07572	277	0.680174	259	1.18596
265	0.534841	265	0.95498	283	0.96684	265	0.906198
271	0.587155	271	1.17383	289	0.720544	271	1.08984
277	0.547075	277	0.909437	295	0.763004	277	0.857386
283	0.541818	283	0.928979	301	0.896711	283	1.2003
289	0.31906	289	0.936114	307	0.91569	289	1.1552
295	0.430646	295	1.04503	313	0.801819	295	0.786782
301	0.462439	301	1.08659	319	0.606546	301	0.926547
307	0.506233	307	1.0267	335	0.868398	307	1.01266
313	0.549752	313	0.768657			313	0.802081
319	0.534434	319	0.898588			319	1.19555
325	0.474301	325	0.733158			325	0.987491
335	0.455128	335	0.905978			335	0.787172

## Sheet: Fig4_halftimes
strain	average halftime	standard error of the mean
EGFP-YscQ non-secreting	134.31	16.0735
EGFP-YscQ secreting	68.2158	7.86556
EGFP-YscQ YscNK175E non-secreting	54.3856	13.7388
EGFP-YscQ YscNK175E secreting	58.4847	10.1993
